# Supplementary material for: Pollution Monitoring using the Leaf-deposited Particulates and Magnetism of the Leaves of 23 Plant Species in a Semi-arid City, Northwest China
Source: Research Square preprint supplement (doi:10.21203/rs.3.rs-330666/v1), 2021-06-14
Supplement: Supplementary file 1 [file daca04ebb7e29f872928fa62.docx]

SI Table.1 List of the 23 plant species sampled in this study. Samples were collected from heights of 0.5 m, 1.5 m and 2.5 m above the ground surface. D = Deciduous species, E = Evergreen species. AD = adaxial surface, AB = abaxial surface, LA = average leaf area per leaf, TLA = total leaf area of the measured sample, NA = no stomata or trichomes were observed. n is the number of samples.

| Plant types | Plant species | Leaves  number | Stomatal density  number/mm2 | Trichomes  number/mm2 | Mean LA  cm2 |
| --- | --- | --- | --- | --- | --- |
| 0.5 m-Lianas-D  (n=14) | *Parthenocissus quinquefolia* (n=14) | 19 | AB: 121.74 | NA | 50.55 |
| 0.5 m-Shrubs-D  (n=51) | *Prunus×cistena* (n=24) | 110 | AB: 226.09 | NA | 11.35 |
| *Berberis thunbergii* (n=27) | 405 | AB: 226.09 | NA | 1.59 |
| 0.5 m-Shrubs-E  (n=205) | *Buxus megistophylla* (n=42) | 215 | AB: 347.83 | NA | 9.28 |
| *Ligustrum×vicaryi* (n=66) | 549 | AB: 417.39 | NA | 7.56 |
| *Buxus sinica* (n=70) | 1050 | AB: 130.43 | NA | 1.79 |
| *Rosa chinensis* (n=27) | 89 | AB: 117.39 | NA | 17.37 |
| 1.5 m-Shrubs-D  (n=73) | *Amygdalus persica* (n=17) | 60 | AB: 139.13 | NA | 26.99 |
| *Syzygium aromaticum* (n=32) | 41 | AD: 60.87 | NA | 35.29 |
| AB: 243.48 | NA |
| *Lonicera maackii* (n=6) | 28 | AB: 278.26 | AD: 2.17 | 18.59 |
| AB: 34.78 |
| *Amygdalus triloba* (n=18) | 66 | AB: 136.96 | AD: 2.17 | 20.01 |
| 1.5 m-Shrubs-E  (n=35) | *Prunus Cerasifera* (n=35) | 166 | AB: 286.96 | NA | 17.18 |
| 1.5 m-Trees-D  (n=40) | *Malus×micromalus Makino* (n=8) | 34 | AB: 217.39 | NA | 20.48 |
| *Cerasus yedoensis* (n=21) | 41 | AB: 356.52 | NA | 41.78 |
| *Sophora japonica f. pendula* (n=11) | 86 | AB: 147.83 | NA | 11.25 |
| 2.5 m-Trees-D  (n=183) | *Fraxinus chinensis* (n=6) | 16 | AB: 193.48 | NA | 24.29 |
| *Ailanthus altissima* (n=16) | 38 | AB: 460.87 | AD: 10.87 | 27.44 |
| AB: 8.70 |
| *Salix babylonica* (n=34) | 164 | AB: 23.91 | AD: 26.09 | 13.16 |
| AB: 2.08 |
| *Robinia pseudoacacia* (n=27) | 205 | NA | AD: 43.48 | 9.18 |
| AB: 78.26 |
| *Sophora japonica* (n=61) | 490 | AB: 217.39 | AD: 6.52 | 9.05 |
| *Salix matsudana* (n=4) | 28 | AB: 8.70 | NA | 9.64 |
| *Ginkgo biloba* (n=15) | 33 | AB: 60.87 | NA | 23.66 |
| *Ulmus pumila* (n=20) | 123 | AB: 134.78 | NA | 9.31 |

SI Table 2 Multiple comparisons results of One-way ANOVA (k-w) performed among seven groups (0.5 m-Lianas-D, 0.5 m-Shrubs-D, 0.5 m-Shrubs-E,1.5 m-Shrubs-D, 1.5 m-Shrubs-E, 1.5 m-trees-D, 2.5 m-trees-D). Statistically significant differences (p<0.05) are highlighted in bold. D = Deciduous, E = Evergreen. weight = weight of trapped particles, SIRMu = SIRM of unwashed plant leaves, SIRMu-w = SIRM of deposited particles, SIRMw = SIRM of washed plant leaves.

| (i) group | (j) group | weight | SIRMu | SIRMu-w | SIRMw |
| --- | --- | --- | --- | --- | --- |
| 0.5 m-Lianas-D | 0.5 m-Shrubs-D | 1 | 1 | 1 | 1 |
| 0.5 m-Shrubs-E | 0.948 | 0.587 | 1 | 0.165 |
| 1.5 m-Shrubs-D | 1 | 1 | 1 | 1 |
| 1.5 m-Shrubs-E | 1 | 1 | 1 | 1 |
| 1.5 m-trees-D | 1 | 1 | 1 | 1 |
| 2.5 m-trees-D | 1 | 1 | 1 | 0.605 |
| 0.5 m-Shrubs-D | 0.5 m-Shrubs-E | **<0.0001** | **<0.0001** | **<0.0001** | **<0.0001** |
|  | 1.5 m-Shrubs-D | **0.019** | 1 | 0.978 | 1 |
| 1.5 m-Shrubs-E | **<0.0001** | **0.006** | **0.006** | 0.194 |
| 1.5 m-trees-D | 1 | 1 | 1 | 1 |
| 2.5 m-trees-D | 0.819 | 1 | 1 | **0.006** |
| 0.5 m-Shrubs-E | 1.5 m-Shrubs-D | **0.013** | **<0.0001** | **0.001** | **0.017** |
|  | 1.5 m-Shrubs-E | 1 | 1 | 1 | 1 |
|  | 1.5 m-trees-D | **<0.0001** | **<0.0001** | **<0.0001** | **0.015** |
|  | 2.5 m-trees-D | **<0.0001** | **<0.0001** | **<0.0001** | 1 |
| 1.5 m-Shrubs-D | 1.5 m-Shrubs-E | 0.765 | 0.582 | 0.724 | 1 |
| 1.5 m-trees-D | 0.401 | 1 | 1 | 1 |
|  | 2.5 m-trees-D | 1 | 1 | 1 | 0.391 |
| 1.5 m-Shrubs-E | 1.5 m-trees-D | **0.003** | **0.020** | **0.016** | 1 |
| 2.5 m-trees-D | **0.003** | 0.104 | **0.005** | 1 |
| 1.5 m-trees-D | 2.5 m-trees-D | 1 | 1 | 1 | 0.203 |

SI Table 3 One-way ANOVA results performed among different functional areas (traffic areas, residential areas and parks) for seven plant types. Statistically significant differences (*p* < 0.05) are highlighted in bold. D = Deciduous, E = Evergreen. weight = weight of trapped particles, SIRMu = SIRM of unwashed plant leaves, SIRMu-w = SIRM of deposited particles, SIRMw = SIRM of washed plant leaves.

| Group | weight | SIRMu | SIRMu-w | SIRMw |
| --- | --- | --- | --- | --- |
| 1.5 m-Lianas-D | 0.159 | 0.351 | 0.216 | 0.851 |
| 0.5 m-Shrubs-D | 0.474 | 0.146 | 0.131 | 0.520 |
| 0.5 m-Shrubs-E | **<0.0001** | **<0.0001** | **<0.0001** | **<0.0001** |
| 1.5 m-Shrubs-D | **<0.0001** | **<0.0001** | **<0.0001** | **<0.0001** |
| 1.5 m-Shrubs-E | 0.256 | 0.069 | **0.043** | 0.201 |
| 1.5 m-trees-D | 0.128 | **0.006** | **0.008** | 0.050 |
| 2.5 m-trees-D | **<0.0001** | **<0.0001** | **<0.0001** | **<0.0001** |

SI Table 4 Multiple comparisons results of One-way ANOVA (k-w) performed among three functional areas (traffic area, residential area and park) for seven groups. Statistically significant differences (*p* < 0.05) are highlighted in bold. “\” = no significant differences. D = Deciduous, E = Evergreen. weight = weight of trapped particles, SIRMu = SIRM of unwashed plant leaves, SIRMu-w = SIRM of deposited particles, SIRMw = SIRM of washed plant leaves.

| Sample(i)-sample(j) | Residential area - park | | | | Residential area - traffic area | | | | Park - traffic area | | | |
| --- | --- | --- | --- | --- | --- | --- | --- | --- | --- | --- | --- | --- |
|  | weight | SIRMu | SIRMu-w | SIRMw | weight | SIRMu | SIRMu-w | SIRMw | weight | SIRMu | SIRMu-w | SIRMw |
| 0.5 m-Liana-D | \ | \ | \ | \ | \ | \ | \ | \ | \ | \ | \ | \ |
| 0.5 m-Shrub-D | \ | \ | \ | \ | \ | \ | \ | \ | \ | \ | \ | \ |
| 0.5 m- Shrub-E | 1 | 0.928 | 1 | 0.418 | **<0.0001** | **<0.0001** | **<0.0001** | **<0.0001** | **<0.0001** | **<0.0001** | **<0.0001** | **0.032** |
| 1.5 m- Shrub-D | 0.818 | 0.702 | 1 | 0.500 | **0.003** | **<0.0001** | **<0.0001** | **0.001** | **0.006** | **<0.0001** | **<0.0001** | **0.003** |
| 1.5 m- Shrub-E | \ | \ | \ | \ | \ | \ | \ | \ | \ | \ | \ | \ |
| 1.5 m-Tree-D | 0.869 | 1 | 1 | \ | 0.054 | **0.028** | **0.028** | **\** | **0.034** | **0.030** | **0.041** | **\** |
| 2.5 m-Tree-D | 0.993 | 1 | 1 | 1 | **<0.0001** | **<0.0001** | **<0.0001** | **0.003** | 0.35 | 0.101 | 0.061 | 0.501 |


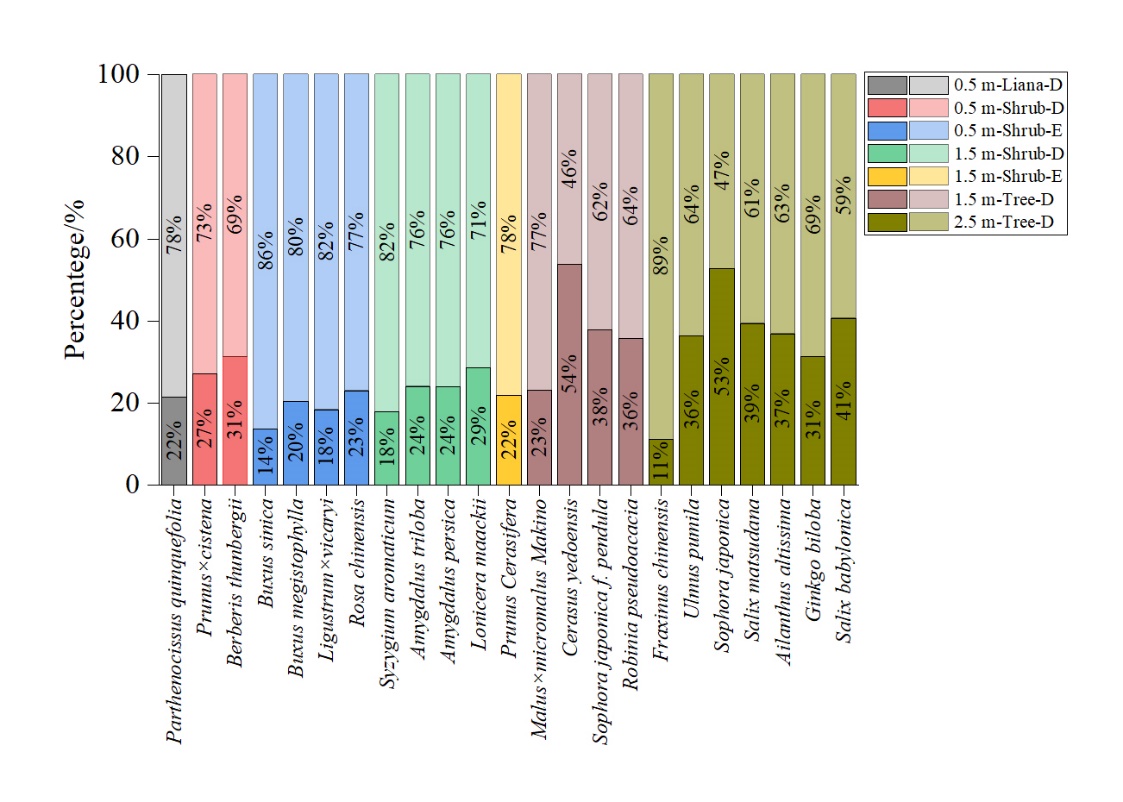


SI Fig. 1 Percentages of SIRMu-w/SIRMu (the under bars) and SIRMw/SIRMu (the upper bars) for the considered plant types (n=23). D= Deciduous (n=361), E=Evergreen (n=240).


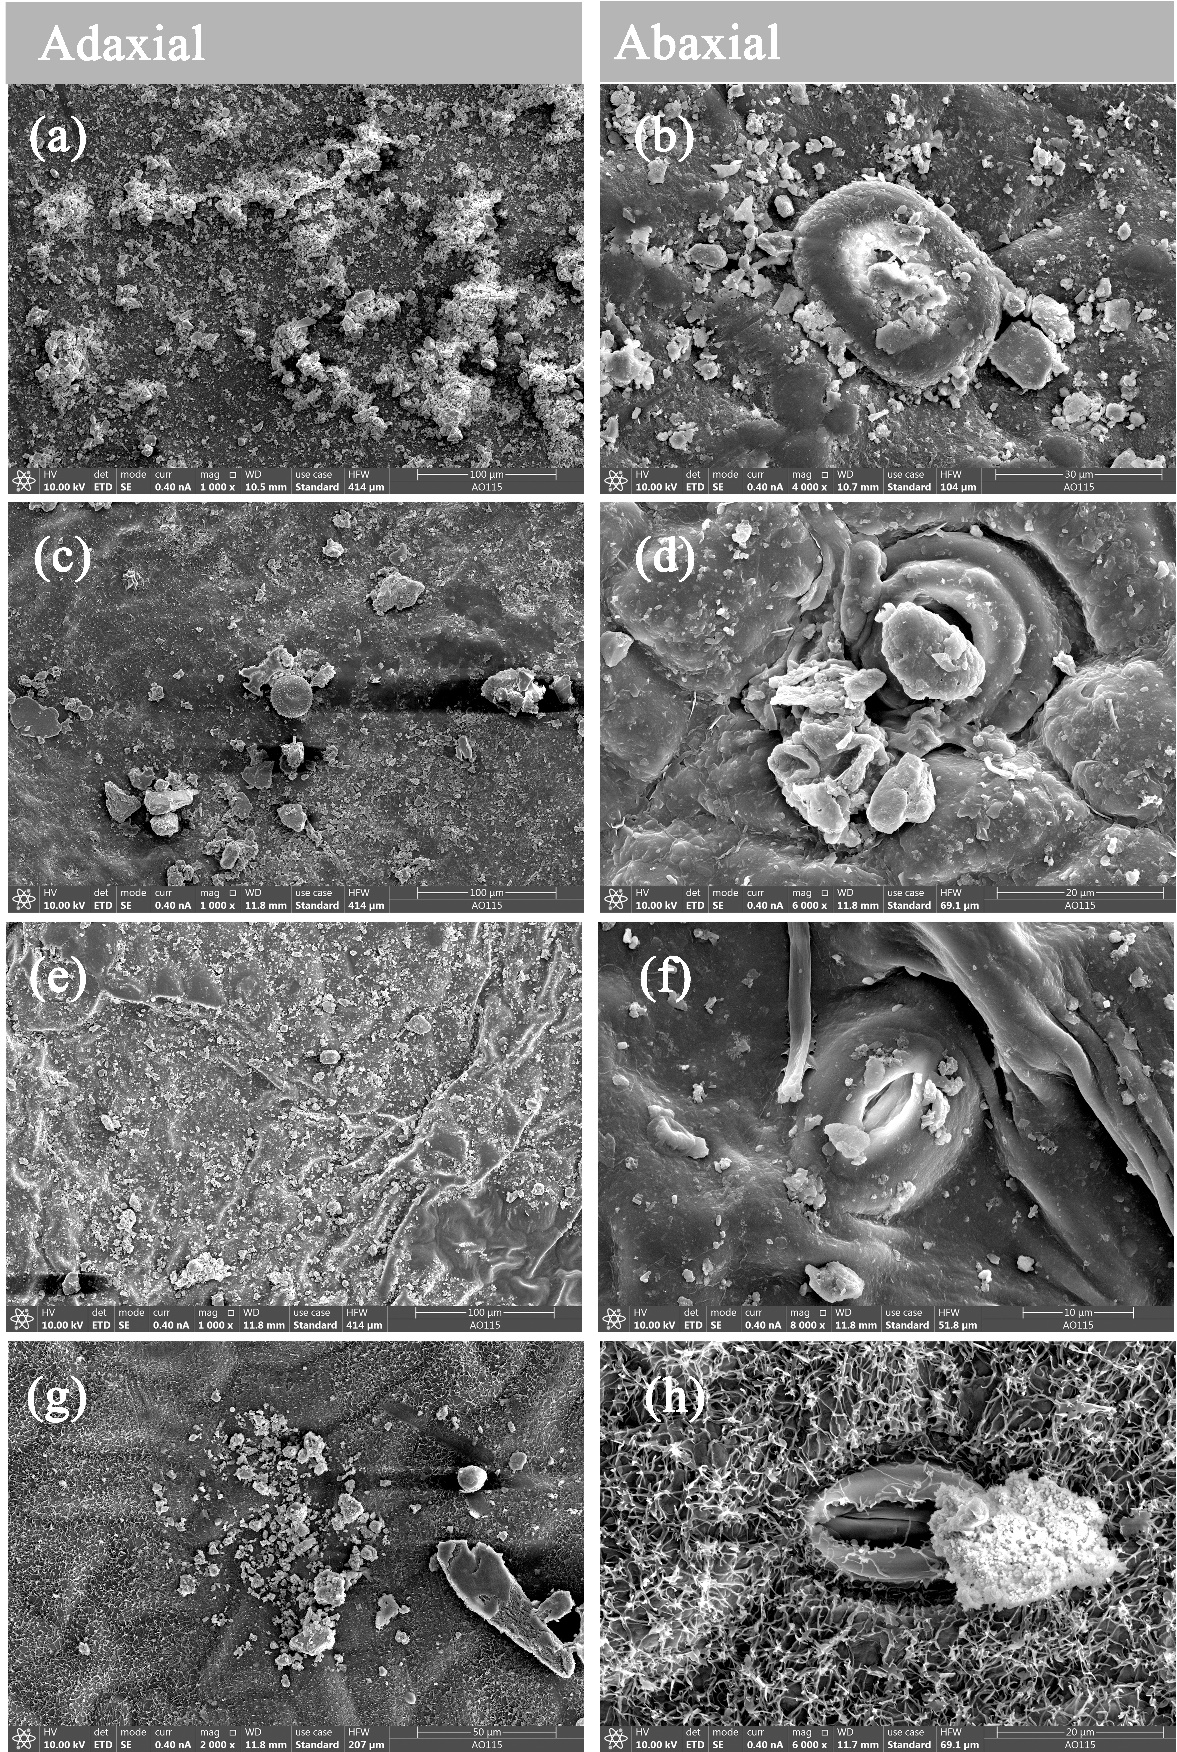


SI Fig. 2 SEM images showing the micromorphology and attachment of particles to adaxial and abaxial surfaces of leaves of 0.5 m-Shrub-E *Buxus sinica* (a) (b), *Buxus megistophylla* (c) (d), *Ligustrum×vicary* (e) (f) and *Rosa chinensis* (g) (h)


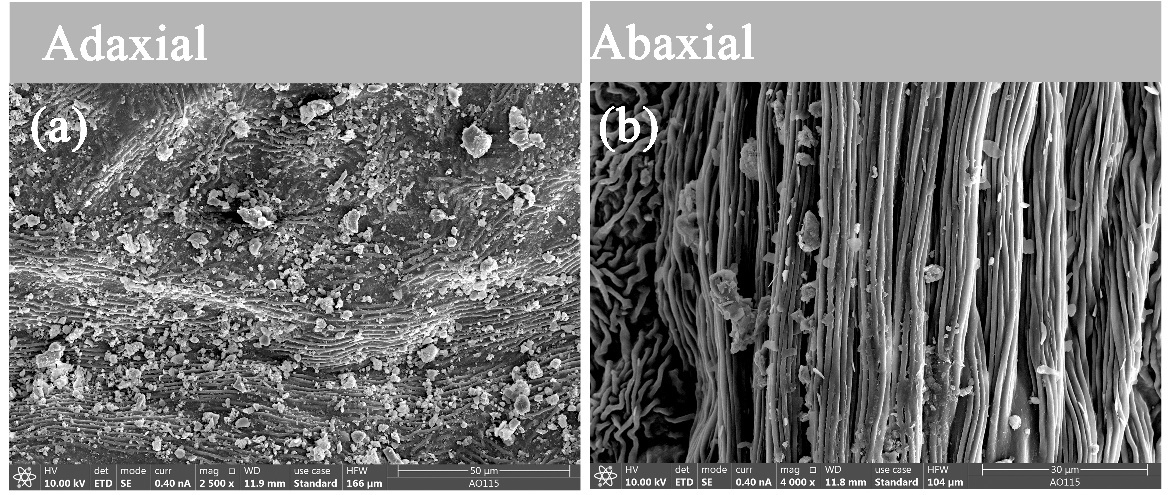


SI Fig. 3 SEM images showing the micromorphology and attachment of particles to the adaxial and abaxial surfaces of leaves of 1.5 m-Shrubs-E. *Prunus Cerasifera* (a) (b).


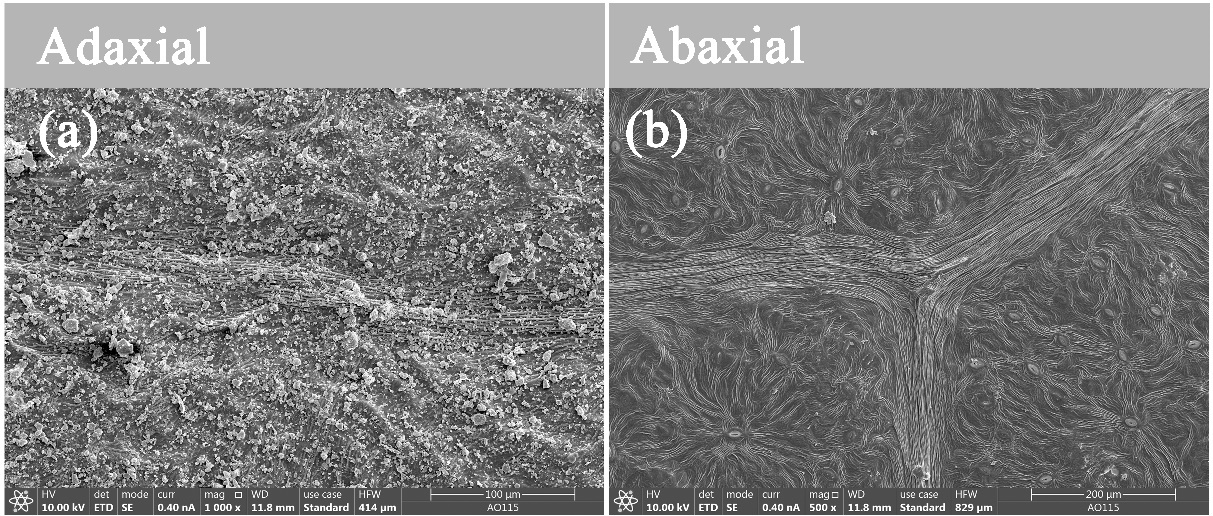


SI Fig. 4 SEM images showing the micromorphology and attachment of particles to the adaxial and abaxial surfaces of leaves of 0.5 m-Lianas-D. *Parthenocissus quinquefolia* (a) (b).


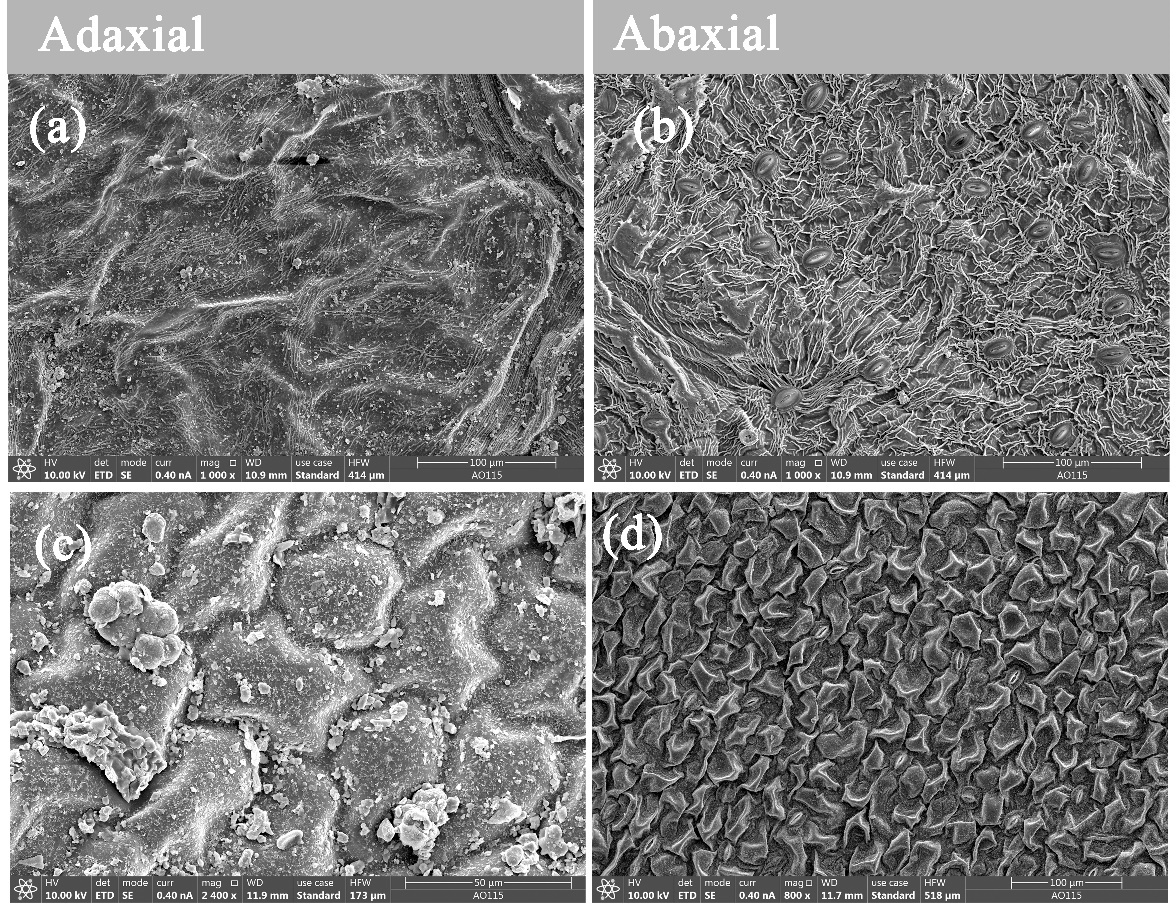


SI Fig. 5 SEM images showing the micromorphology and attachment of particles to the adaxial and abaxial surfaces of leaves of 0.5 m-Shrubs-D. *Prunus×cistena* (a) (b) and *Berberis thunbergii* (c) (d)


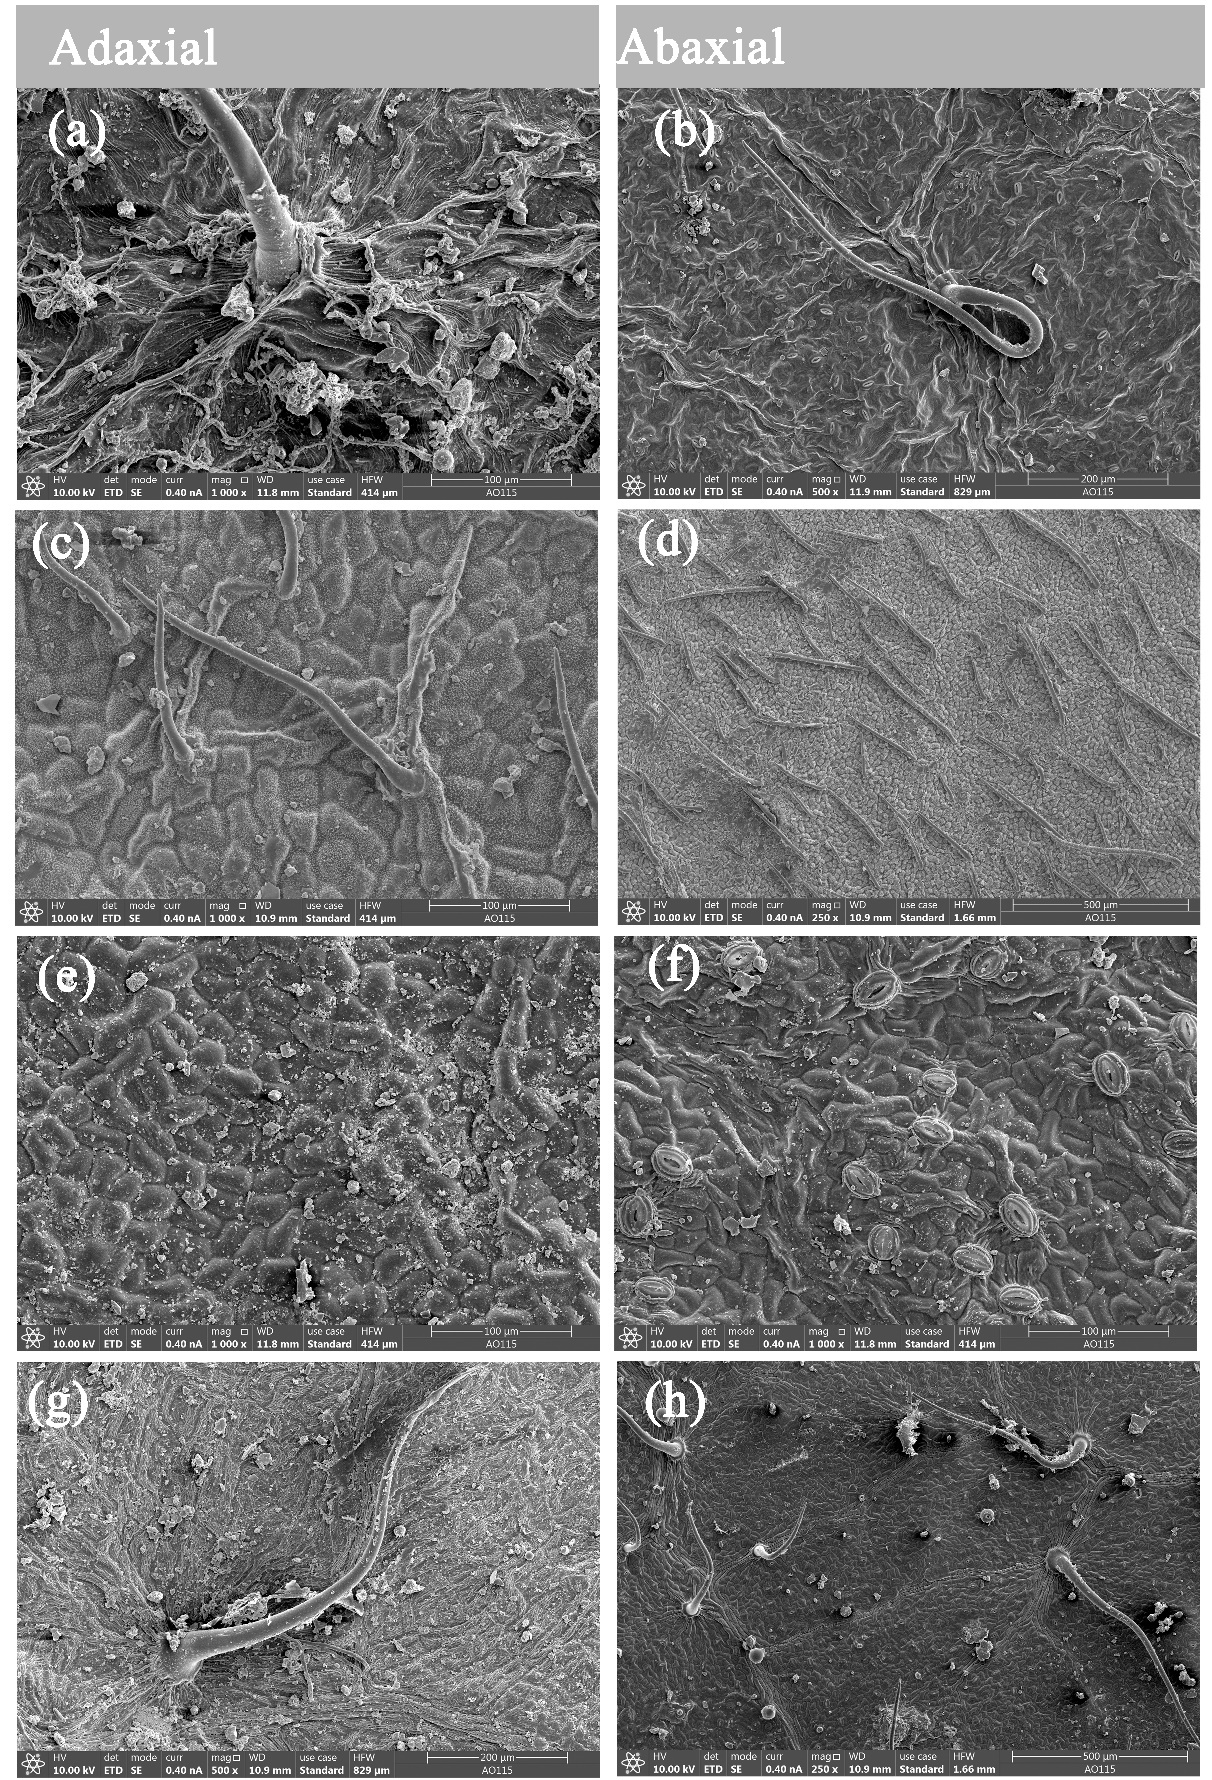


SI Fig. 6 SEM images showing the micromorphology and attachment of particles to the adaxial and abaxial surfaces of leaves of 1.5 m-Shrubs-D. *Amygdalus triloba* (a) (b), *Syzygium aromaticum* (c) (d), *Amygdalus persica* (e) (f) and *Lonicera maackii* (g) (h)


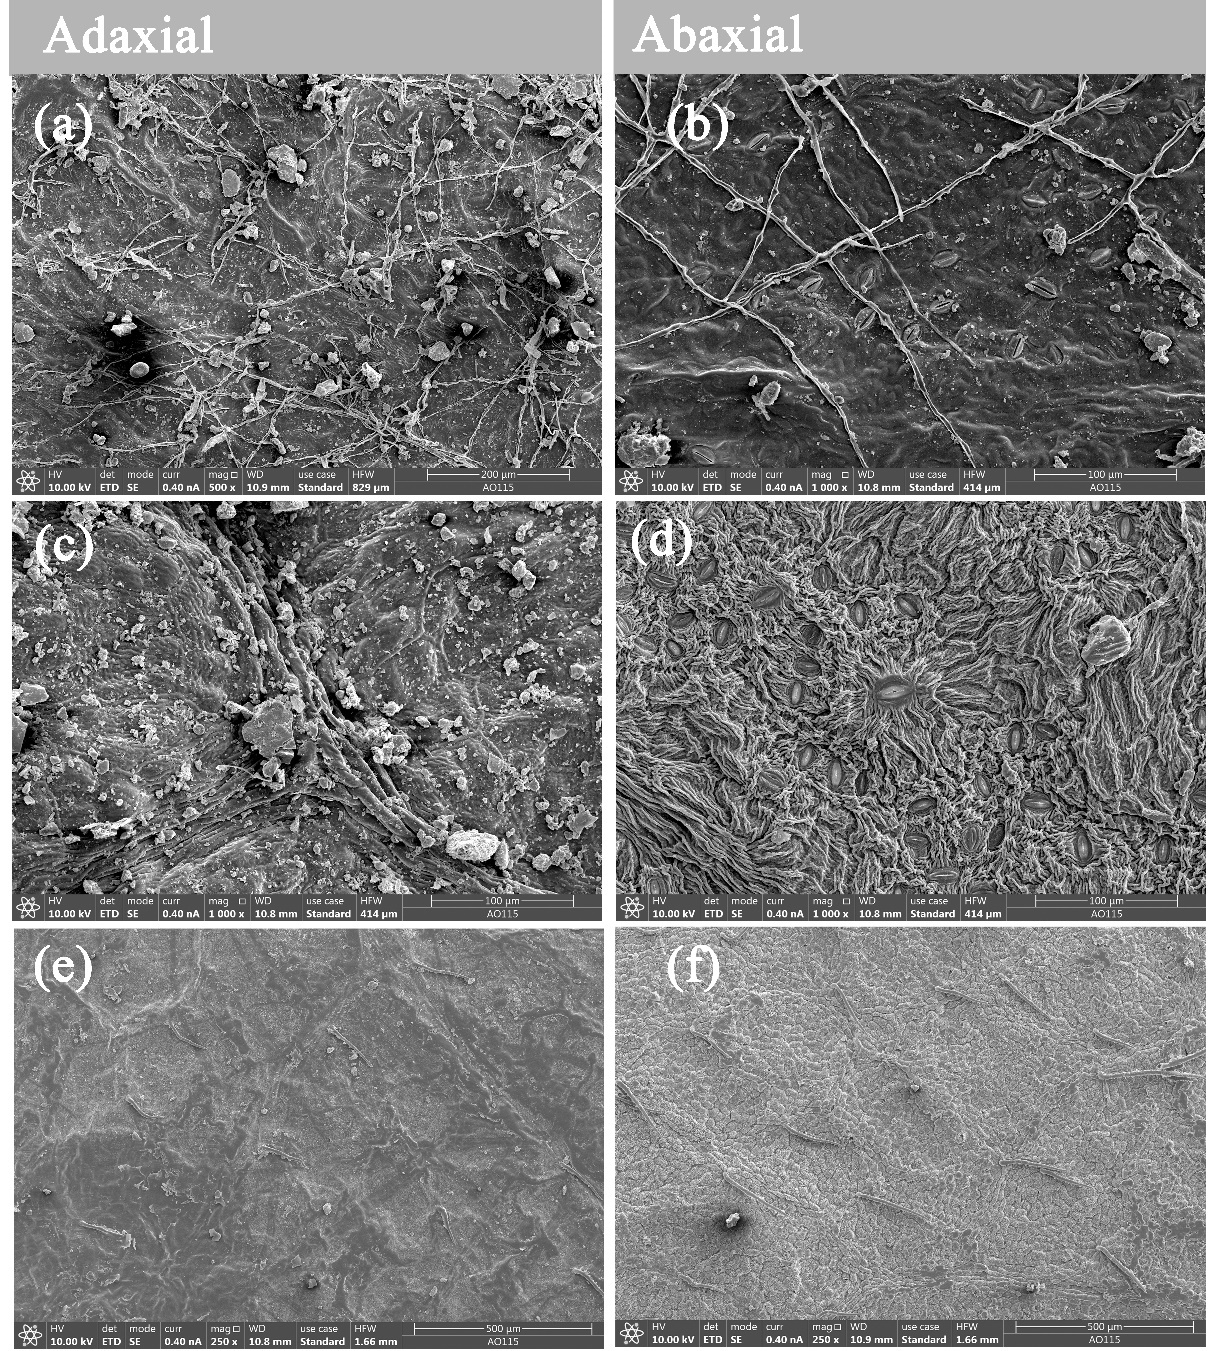


SI Fig. 7 SEM showing the micromorphology and attachment of particles to the adaxial and abaxial surfaces of leaves of 1.5 m-Tree-D. *Malus×micromalus Makino* (a) (b)*, Cerasus yedoensis* (c) (d)and *Sophora japonica f. pendula* (e) (f)


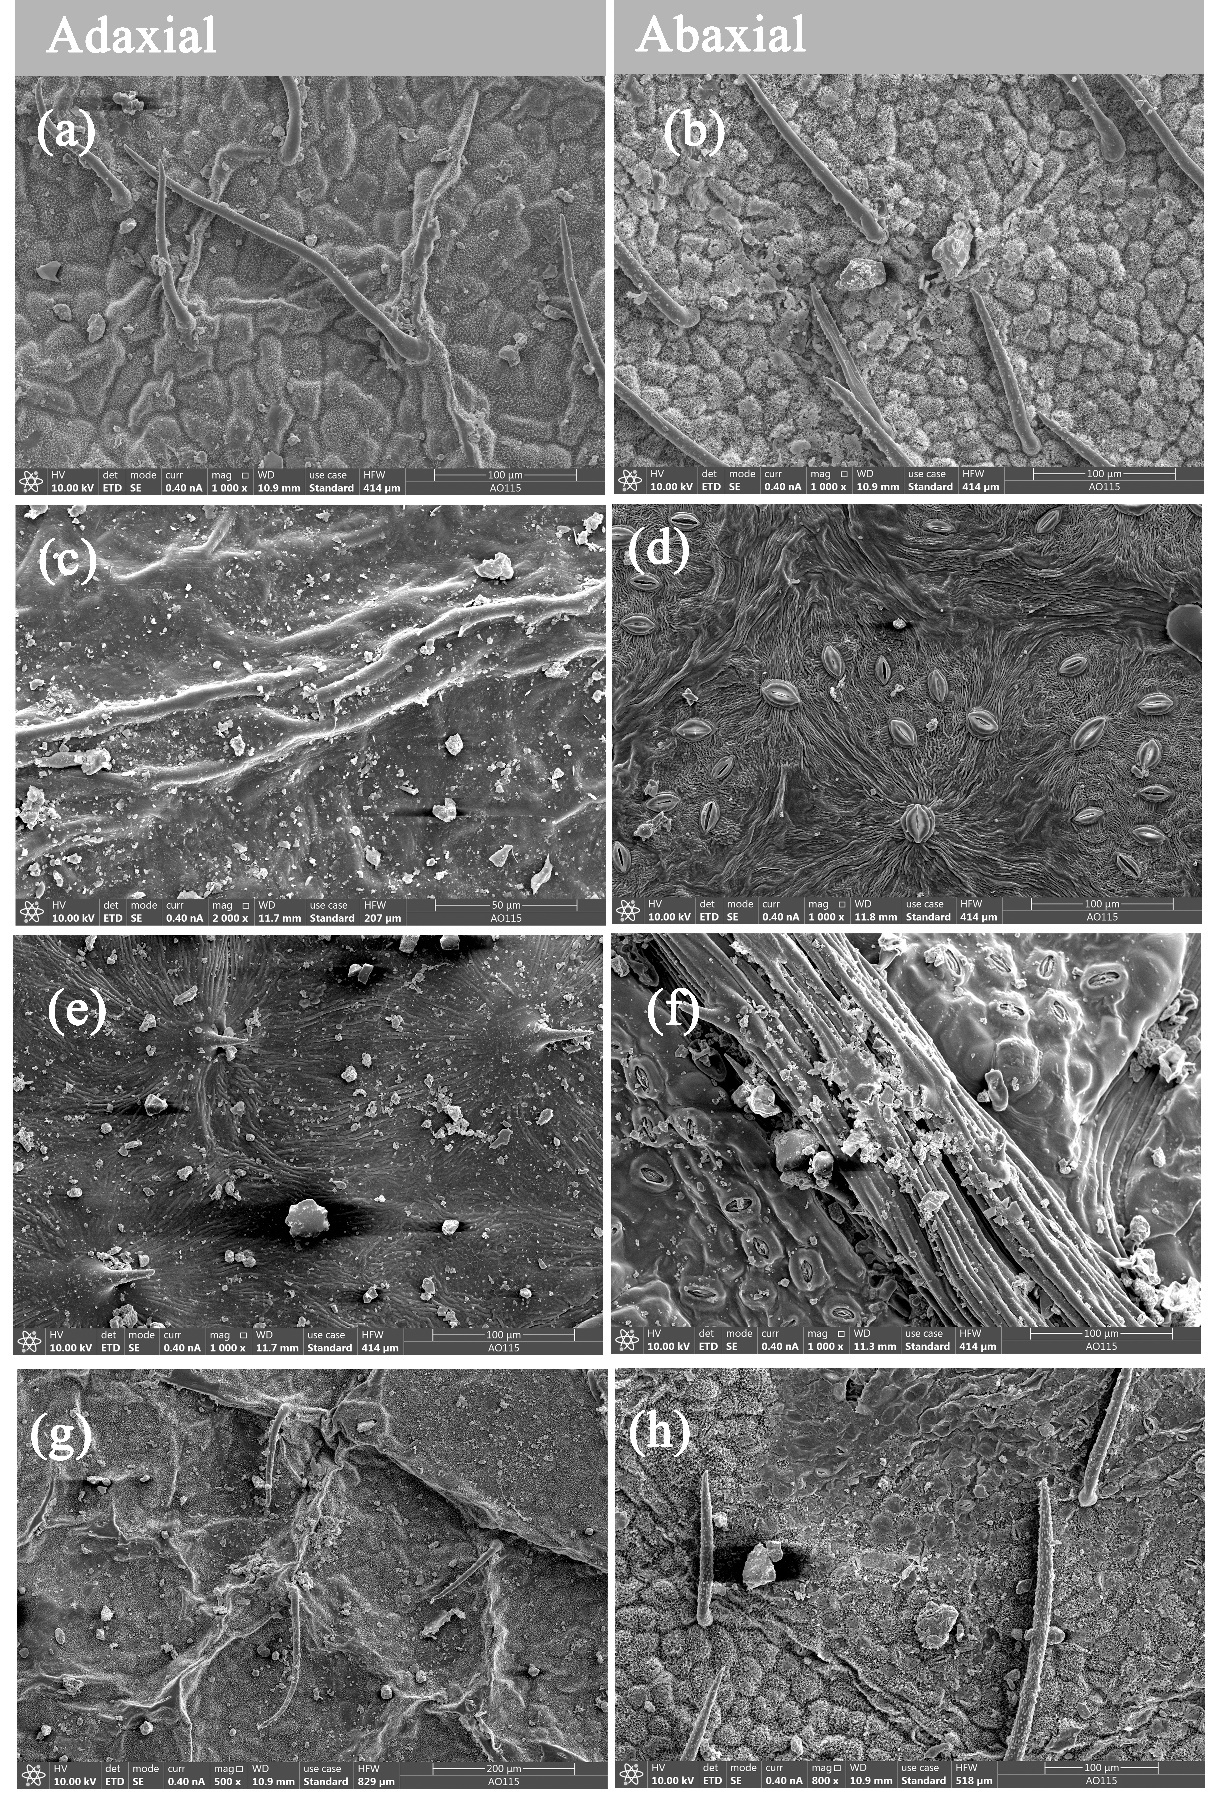


SI Fig. 8 SEM images showing the micromorphology and attachment of particles to the adaxial and abaxial surfaces of leaves of 2.5 m-Trees-D. *Robinia pseudoacacia* (a) (b), *Fraxinus chinensis* (c) (d), *Ulmus pumila* (e) (f), *Sophora japonica* (g) (h).

1
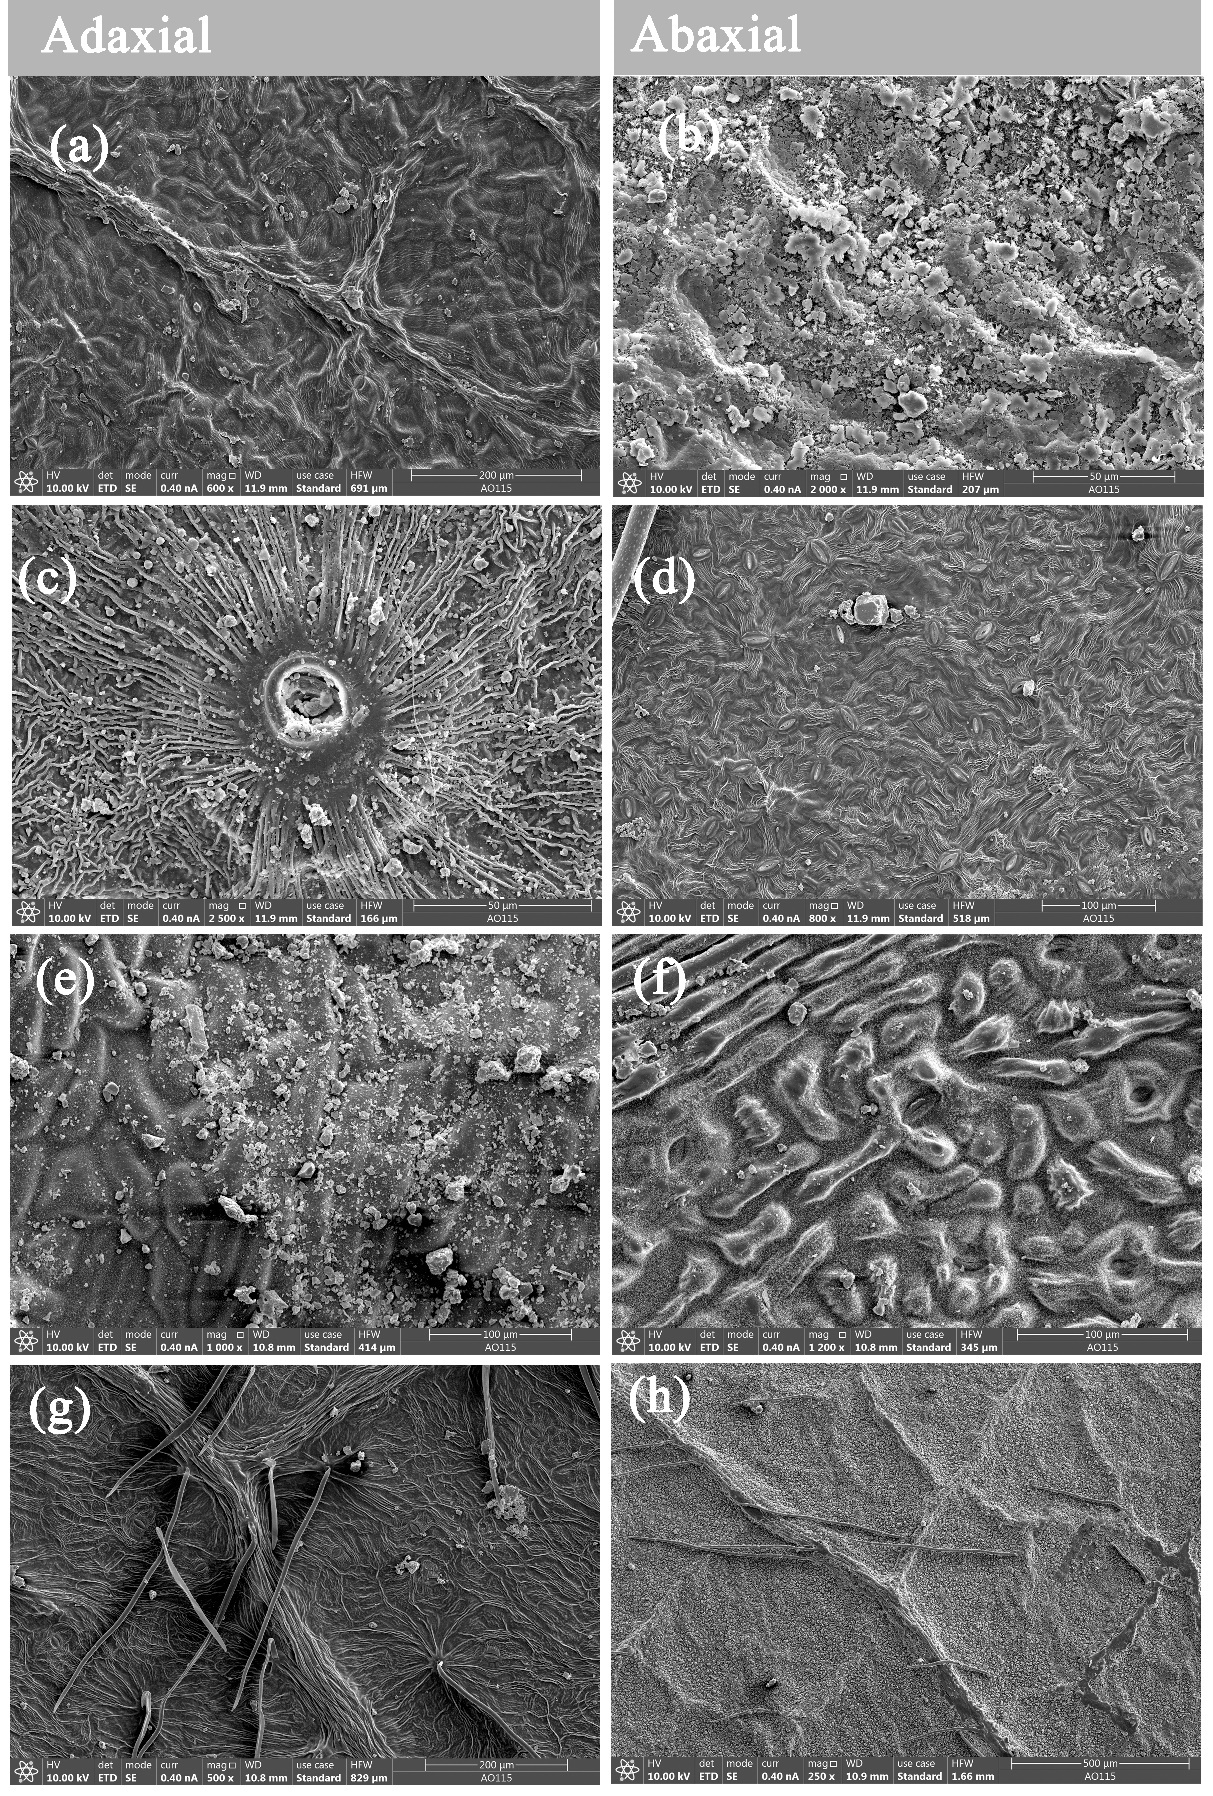


SI Fig. 9 SEM images showing the micromorphology and attachment of particles to the adaxial and abaxial surfaces of leaves of 2.5 m-Trees-D. *Salix matsudana* (a) (b), *Ailanthus altissima* (c) (d), *Ginkgo biloba* (e) (f) and *Salix babylonica* (g) (h)
